# Supplementary material for: Dense-Stream YOLOv8n: A Lightweight Model Method for Real-Time Crowd Monitoring in Smart Libraries
Source: Research Square preprint supplement (doi:10.21203/rs.3.rs-5446660/v1), 2024-12-12
Supplement: Supplementary file 1 [file e550a9bfacbae3d60b112e1b.docx]

Video 1 (detection effects after trimming at triple speed for the entire day)

Video 2 (detection effects at normal speed for a specific time period)
